# Supplementary material
Source: PubMed Central journal article supplement (PMC3441147)

1A

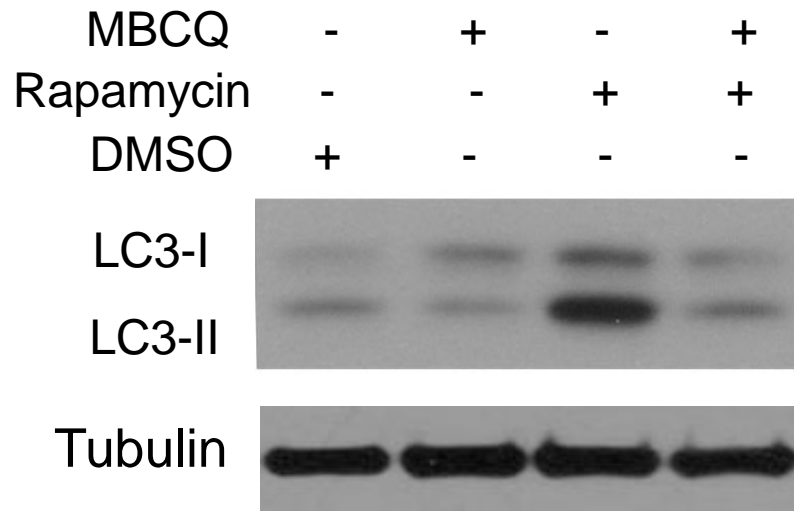

1B

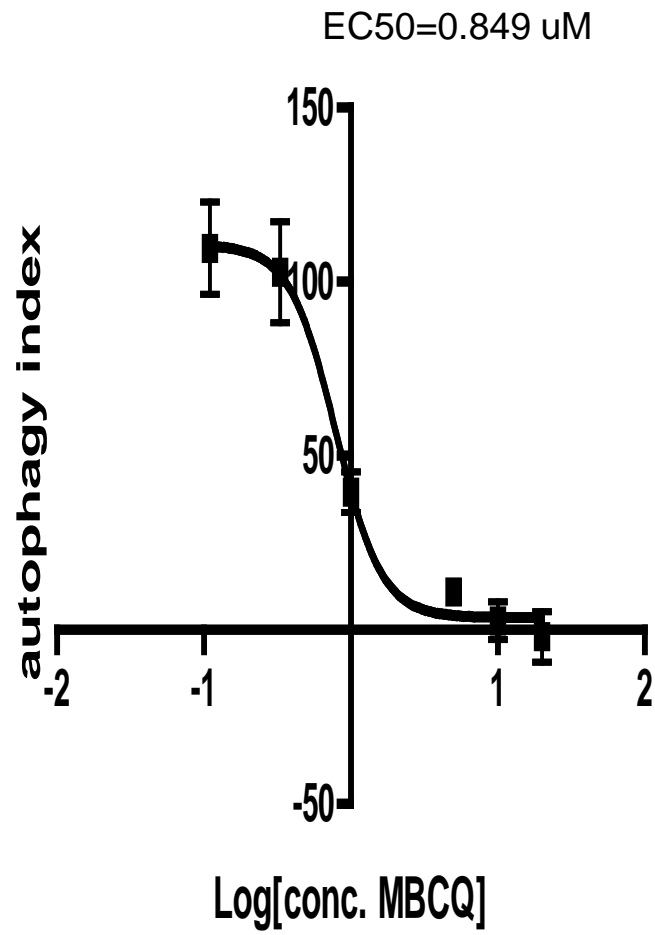

1C

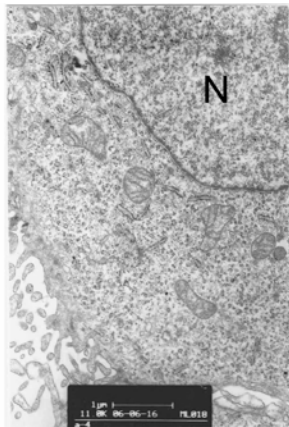

DMSO

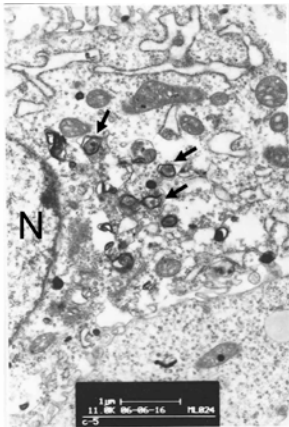

Rapamycin

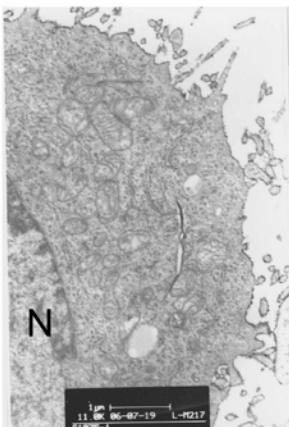

MBCQ

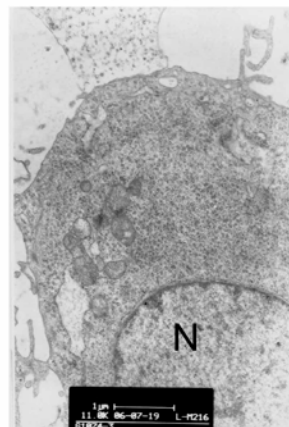

Rapamycin+MBCQ

1D

EC50=0.744 (uM)

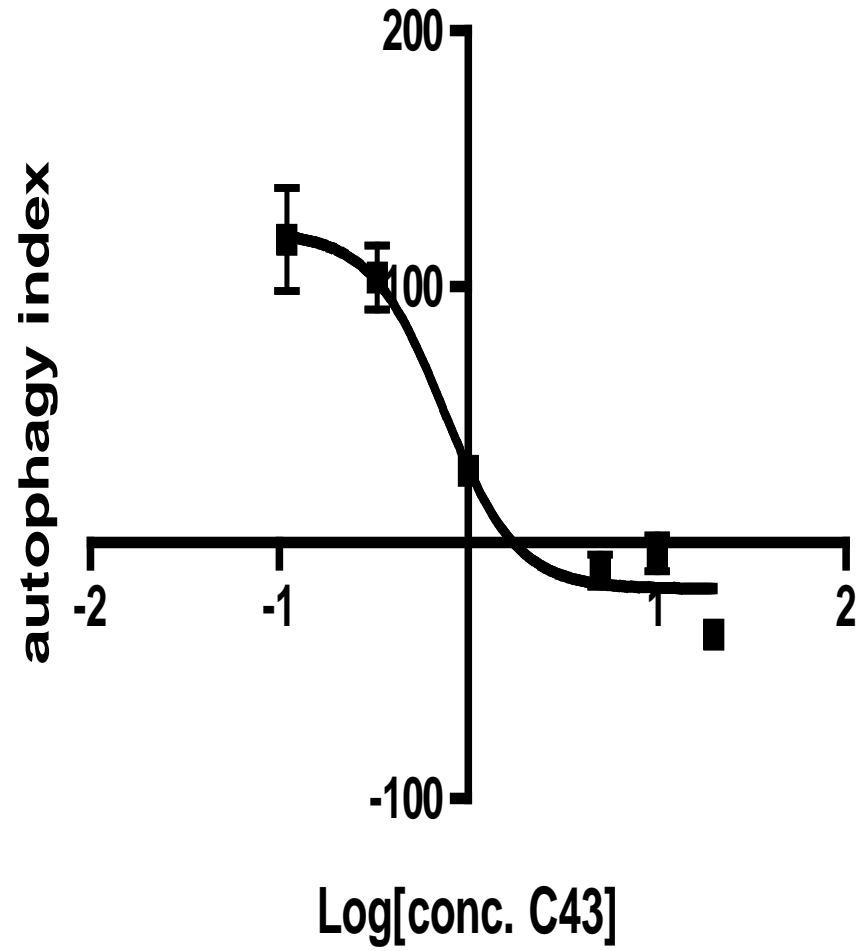

2A

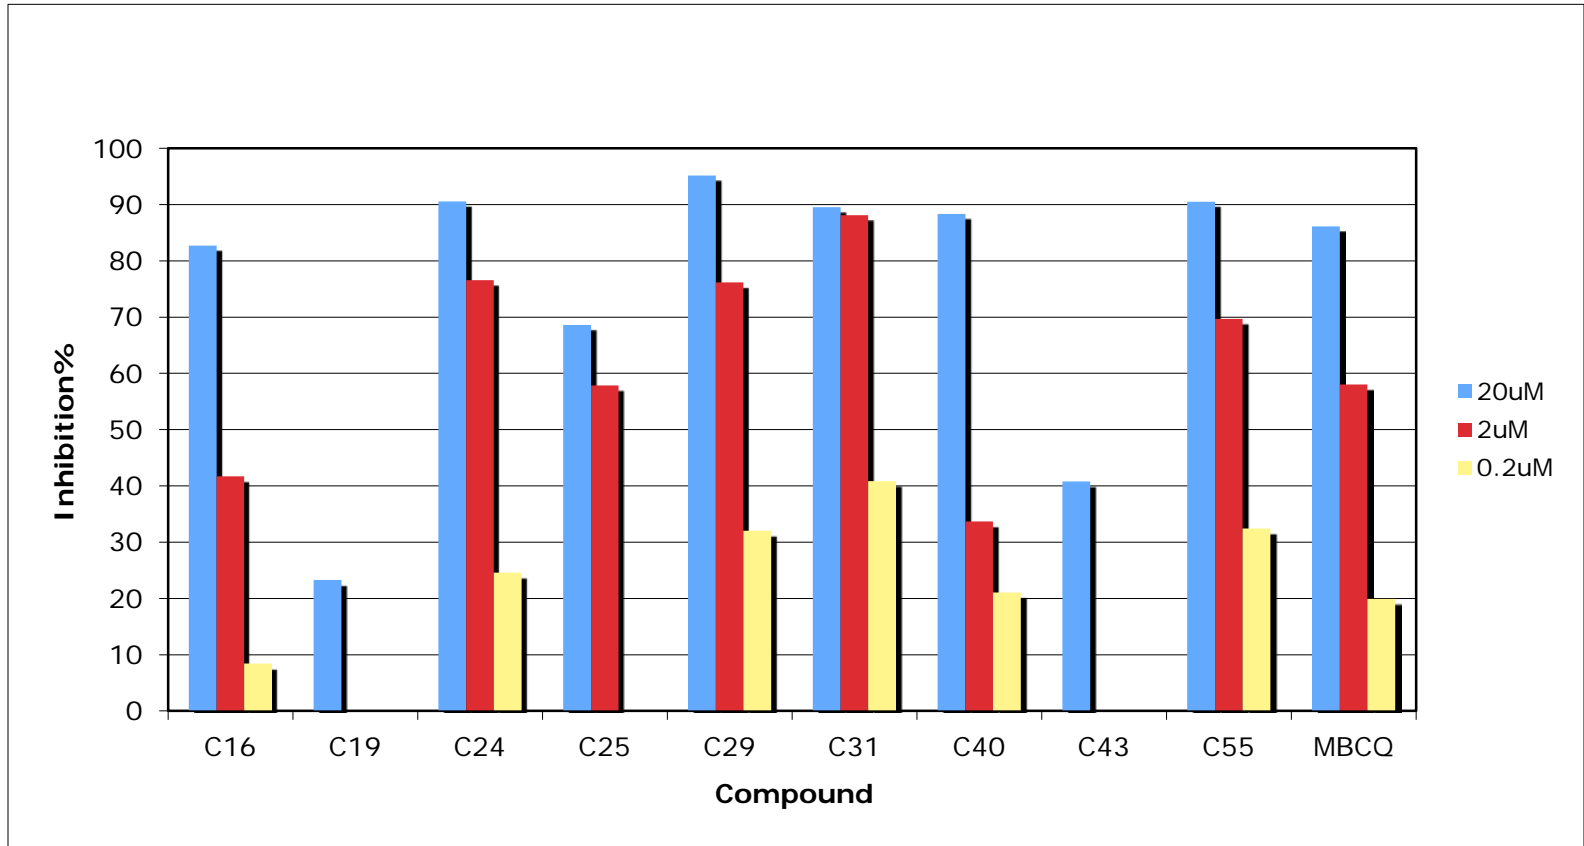

2B

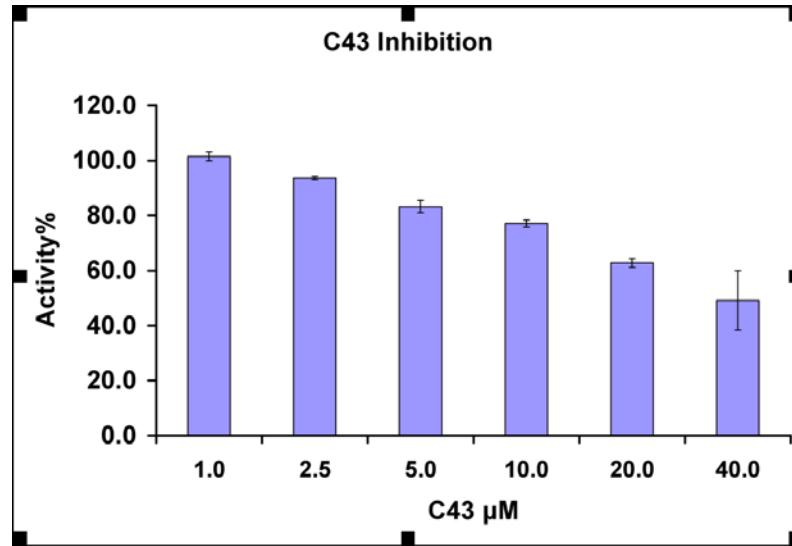

2C

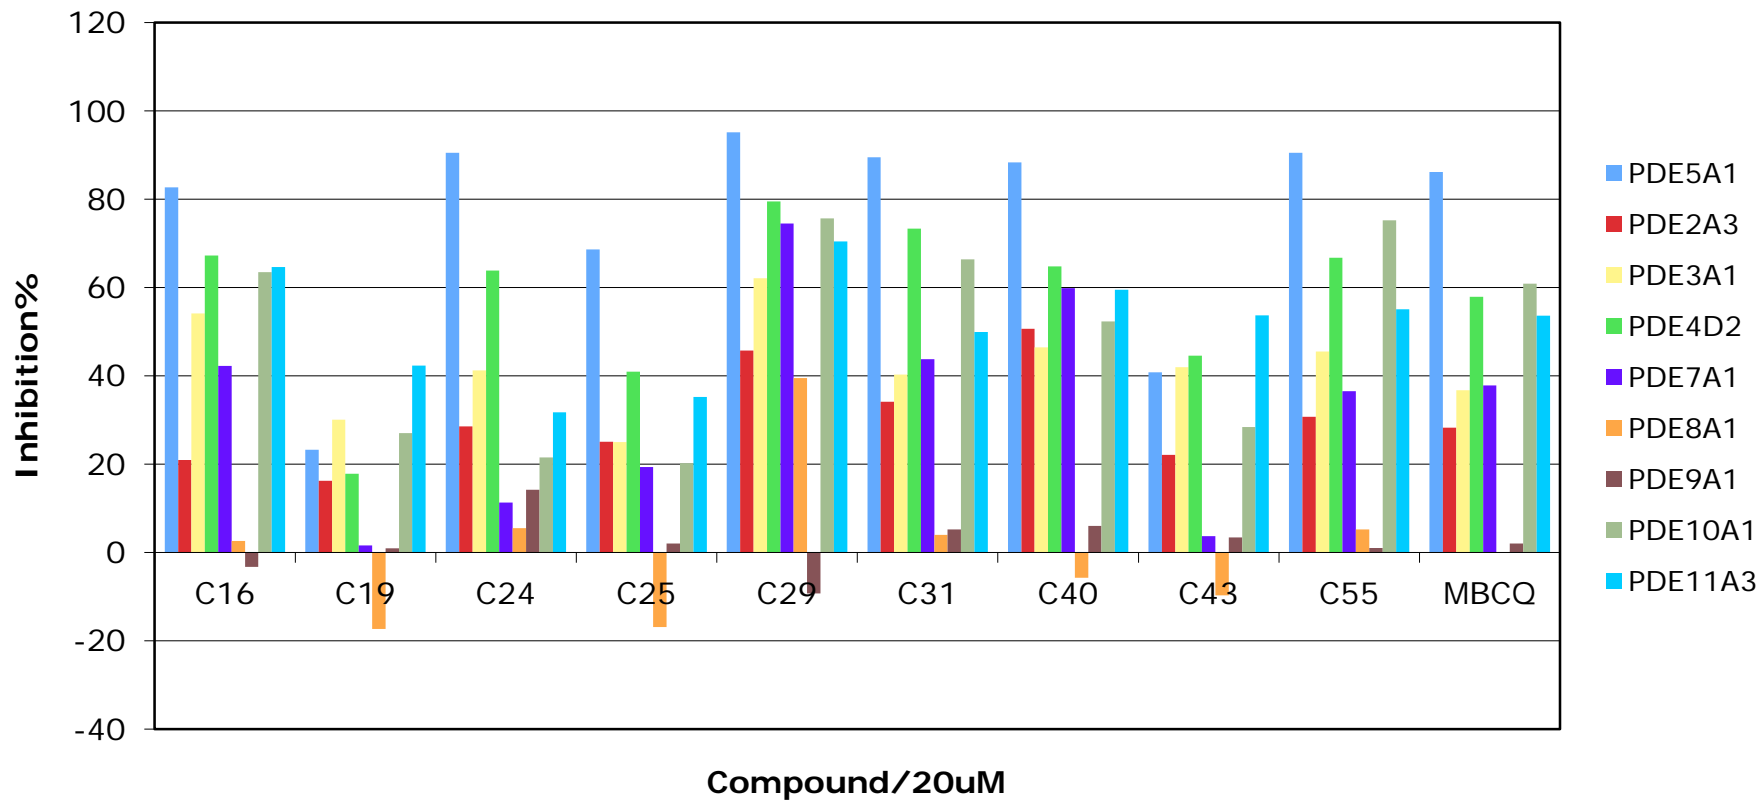

# 2D

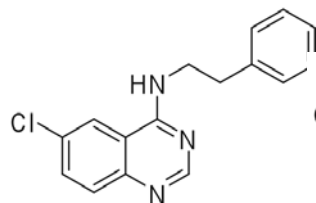

C16  
EC<sub>50</sub>( $\mu$ M) 0.79

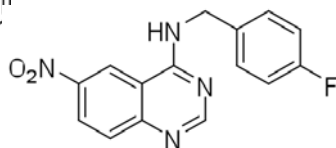

C24  
0.28

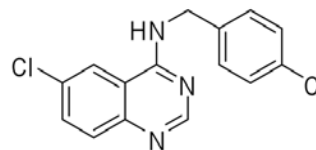

C25  
0.36

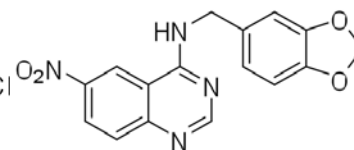

C29  
Inactive

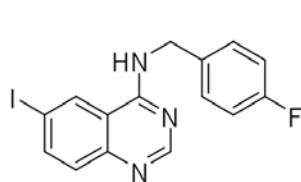

C31  
EC<sub>50</sub>( $\mu$ M) 0.66

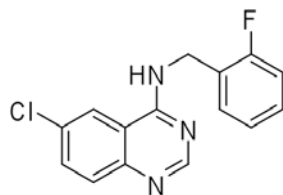

C40  
0.88

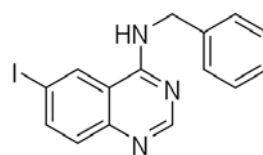

C55  
0.23

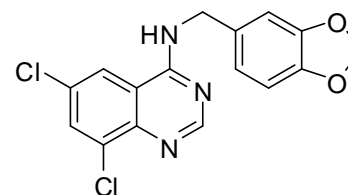

C19  
Inactive



2E

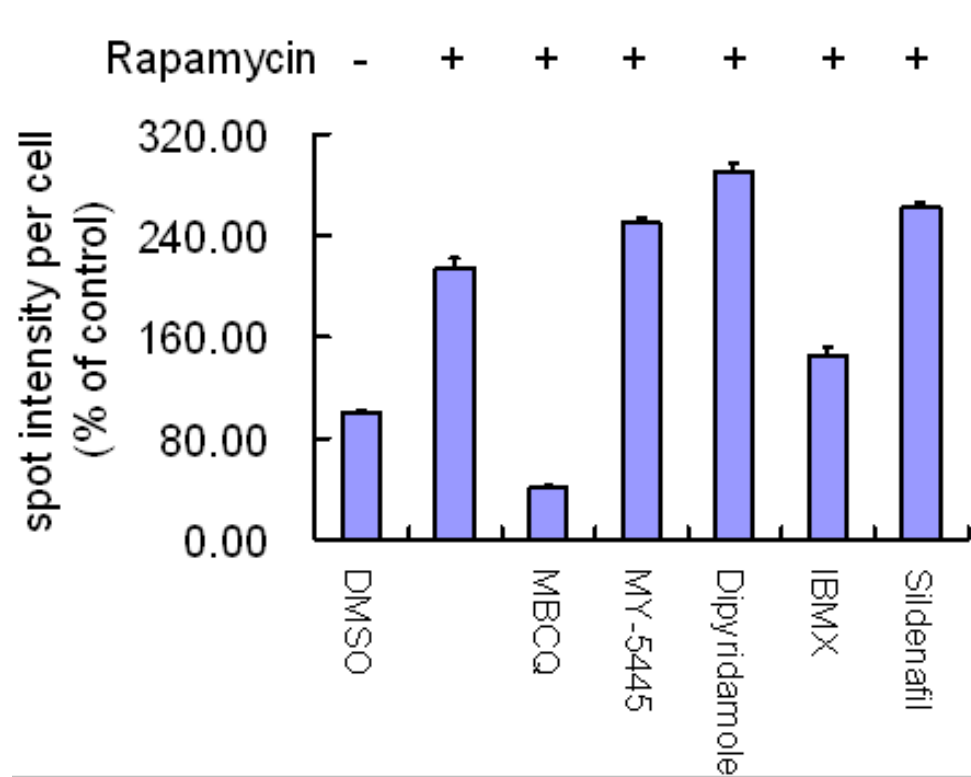

3A

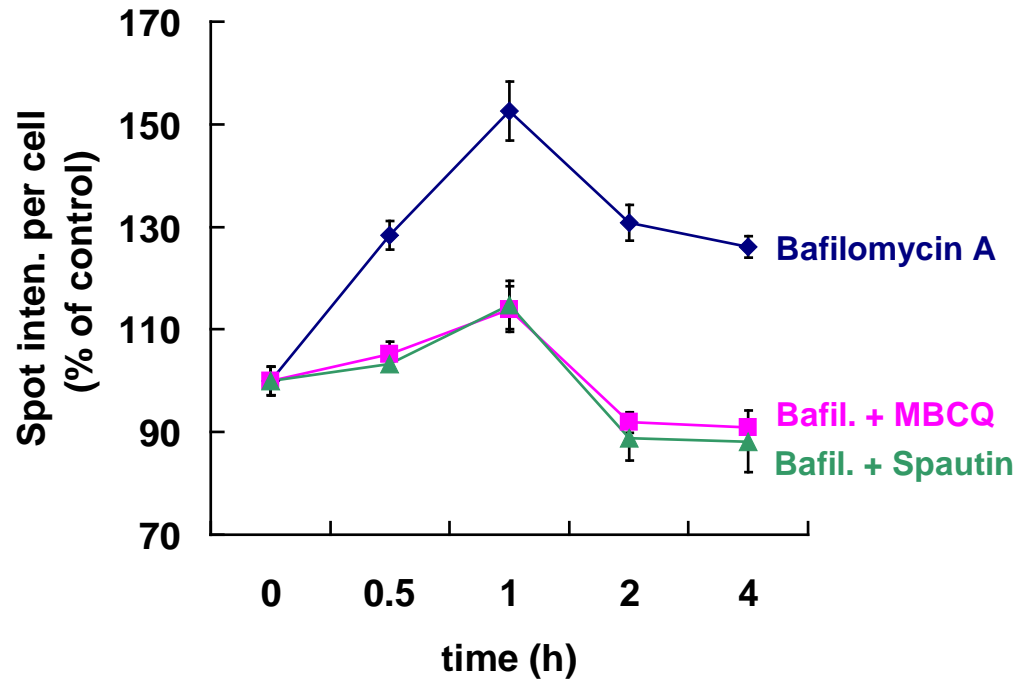

3B

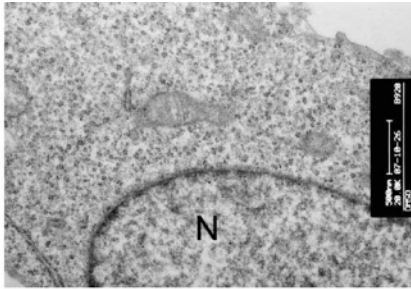

DMSO

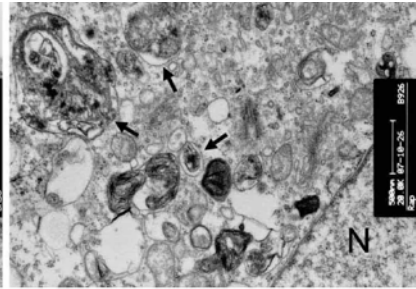

Rapamycin

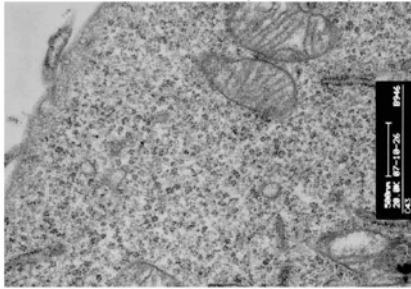

Spautin

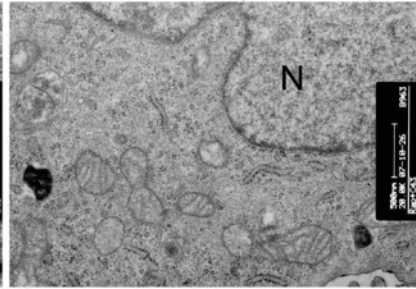

Rapamycin + Spautin

4A

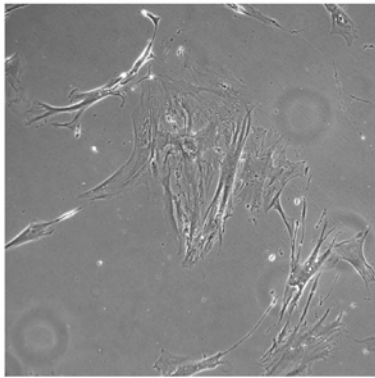

DMSO

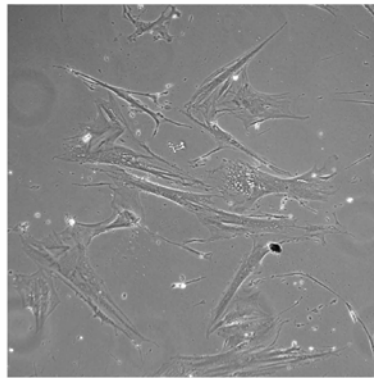

Spautin

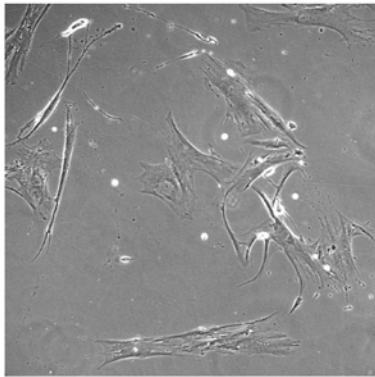

DMSO  
glucose free

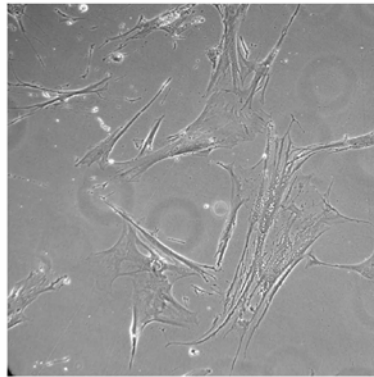

Spautin  
glucose free

4B

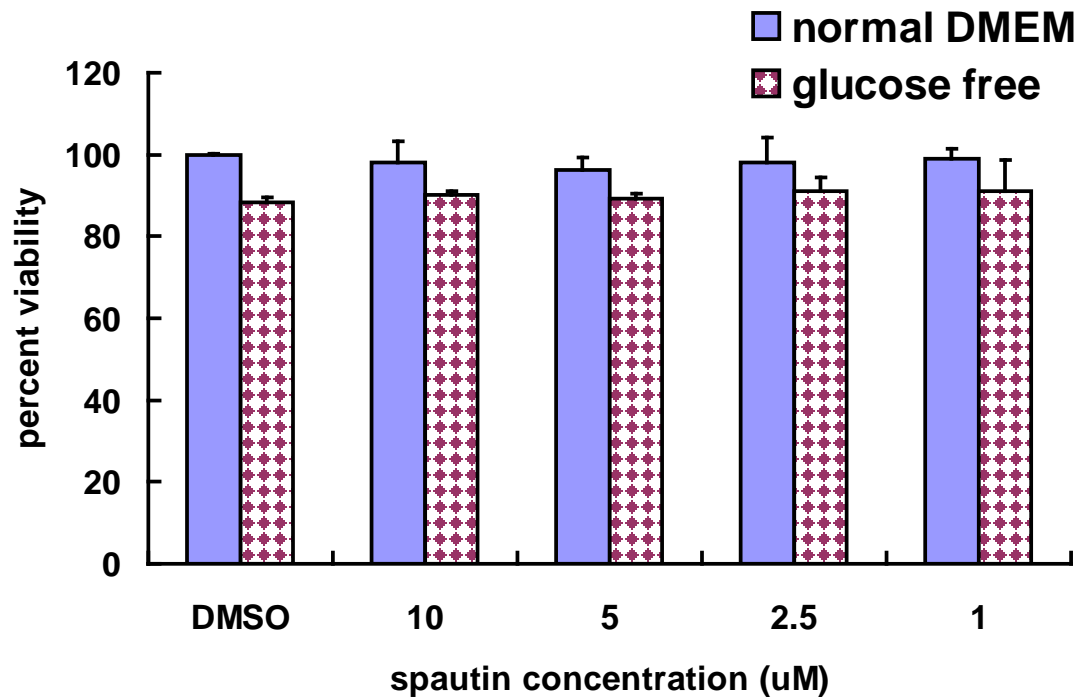

4C

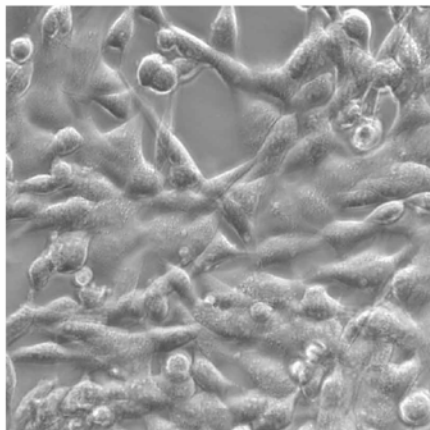

DMSO

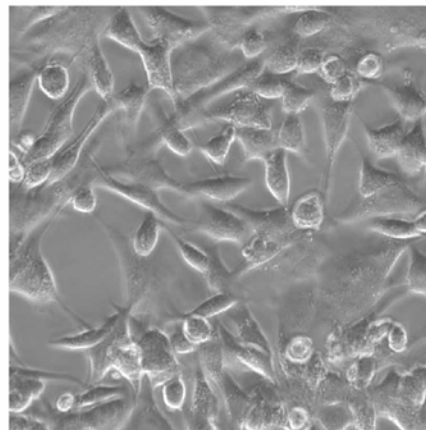

Spautin

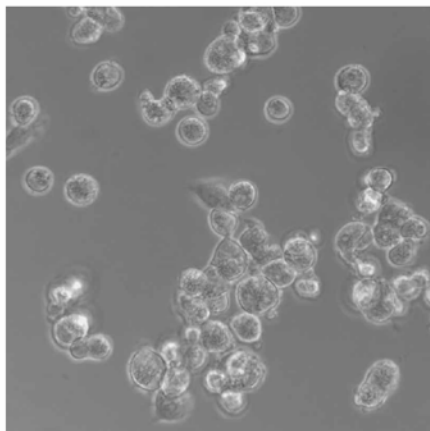

Etop.

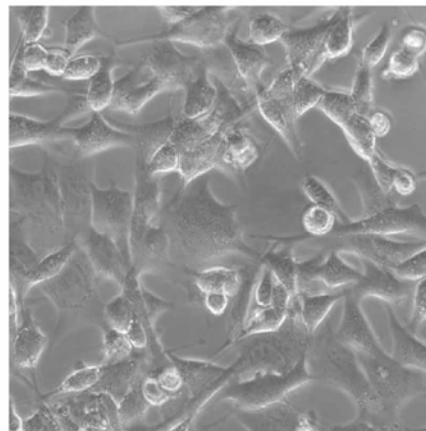

Etop. + Spautin

4D

MTT assay of DKO-MEFs

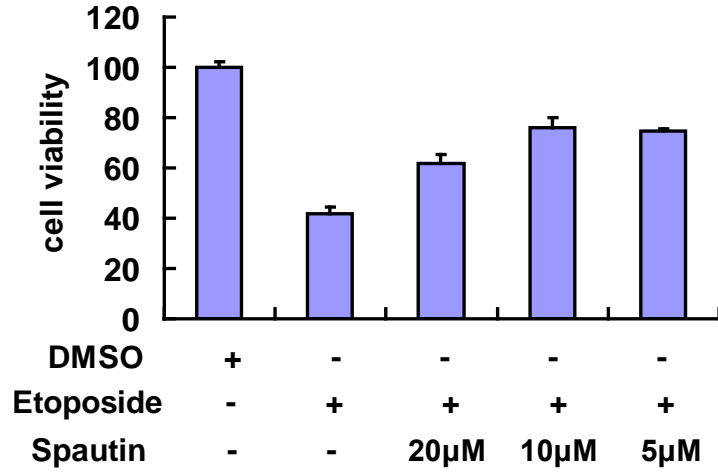

MTT assay of DKO-MEFs

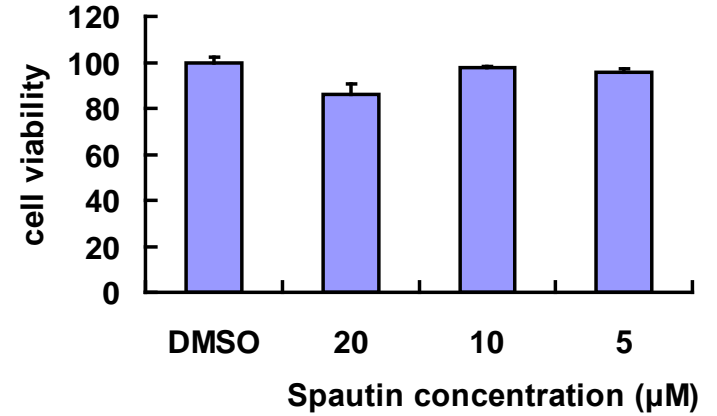

4E

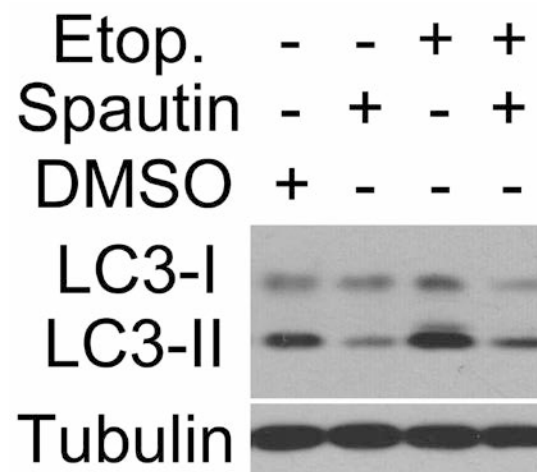



5A

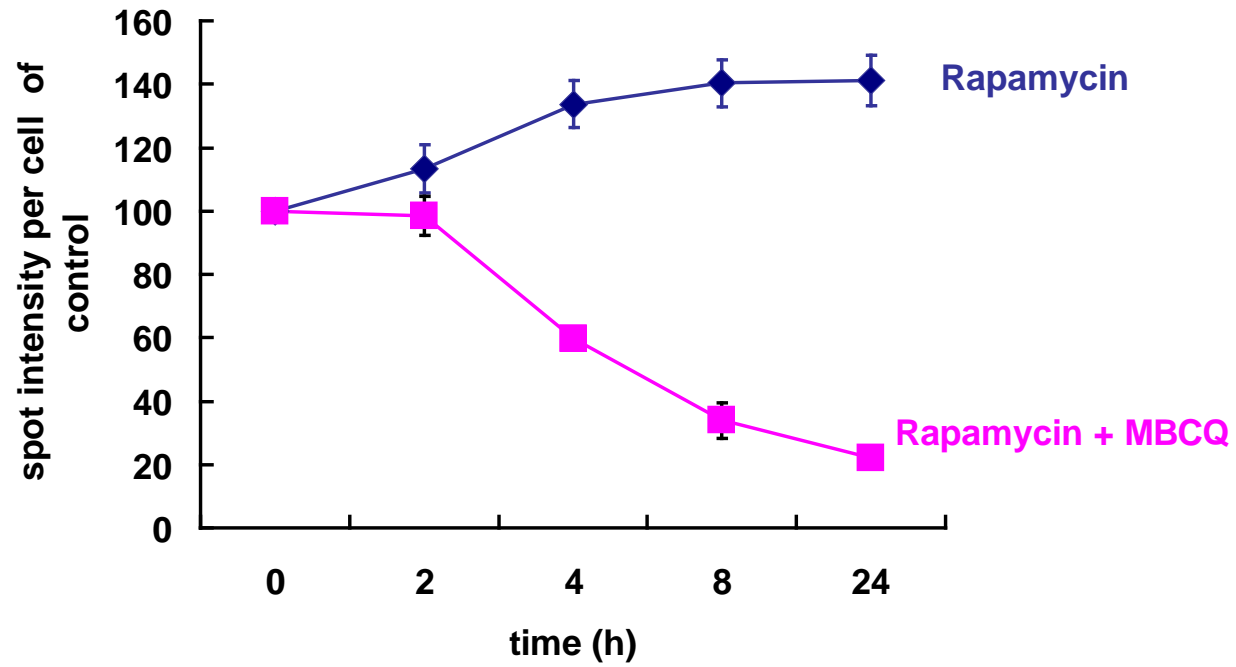

5B

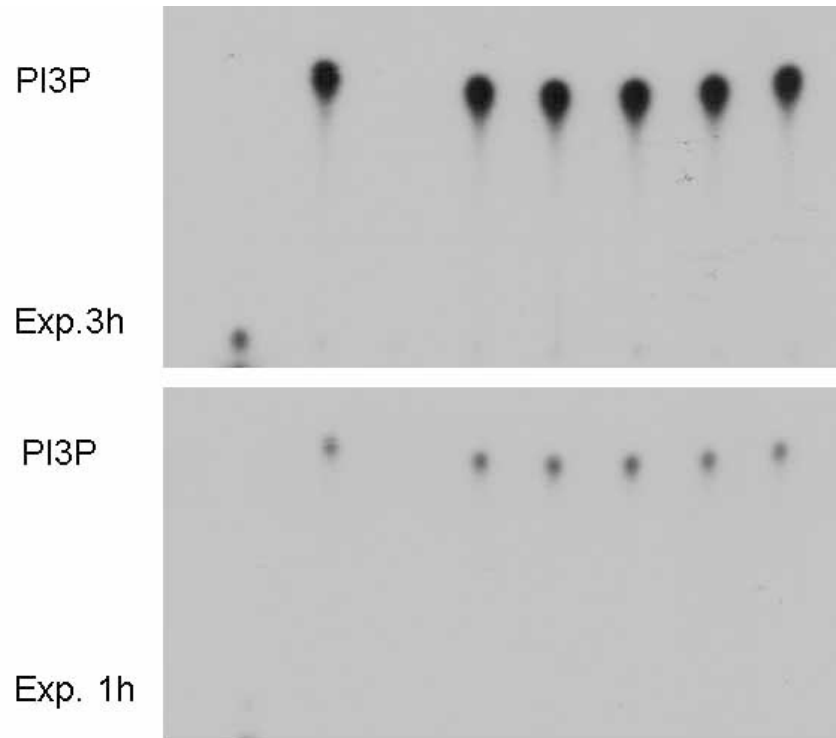

|                         | 1 | 2 | 3 | 4  | 5 | 6   | 7    | 8     |
|-------------------------|---|---|---|----|---|-----|------|-------|
| Flag-Vps34/GFP-Beclin-1 | - | + | + | +  | + | +   | +    | +     |
| Wartmannin(10uM)        | - | - | + | -  | - | -   | -    | -     |
| Spautin (uM)            | - | - | - | 10 | 1 | 0.1 | 0.01 | 0.001 |

Please correct for spelling: wortmannin, uM, and spautin-1

**5C**

|                |          |          |          |
|----------------|----------|----------|----------|
| <b>GFP</b>     | <b>+</b> | <b>+</b> | <b>+</b> |
| <b>MBCQ</b>    | <b>-</b> | <b>+</b> | <b>-</b> |
| <b>Spautin</b> | <b>-</b> | <b>-</b> | <b>+</b> |
| <b>DMSO</b>    | <b>+</b> | <b>-</b> | <b>-</b> |

**Anti-GFP**

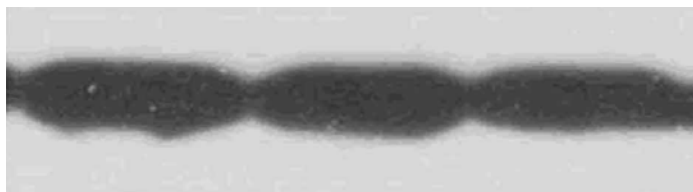

**Tubulin**

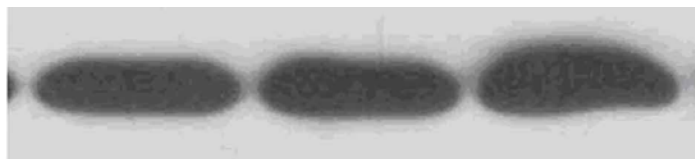

|           |                 |          |          |          |          |
|-----------|-----------------|----------|----------|----------|----------|
| <b>5D</b> | <b>GFP-Arf1</b> | <b>+</b> | <b>+</b> | <b>+</b> | <b>+</b> |
|           | <b>MBCQ</b>     | <b>-</b> | <b>-</b> | <b>-</b> | <b>-</b> |
|           | <b>Spautin</b>  | <b>-</b> | <b>-</b> | <b>-</b> | <b>+</b> |
|           | <b>Rap</b>      | <b>+</b> | <b>+</b> | <b>+</b> | <b>+</b> |
|           | <b>DMSO</b>     | <b>+</b> | <b>-</b> | <b>-</b> | <b>-</b> |

**Anti-GFP**

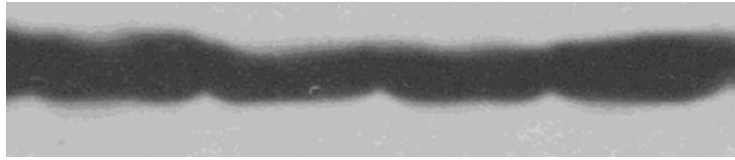

**Tubulin**

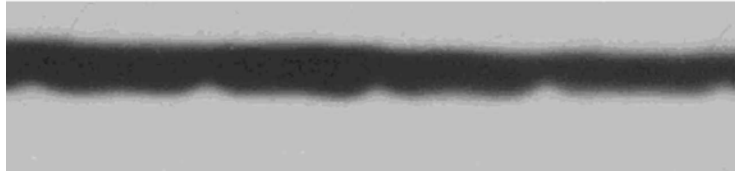

**5E**

**GFP-MT**

**+**

**+**

**+**

**+**

**MBCQ**

**-**

**-**

**-**

**-**

**Spautin**

**-**

**-**

**-**

**+**

**Rap**

**+**

**+**

**+**

**+**

**DMSO**

**+**

**-**

**-**

**-**

**Anti-GFP**

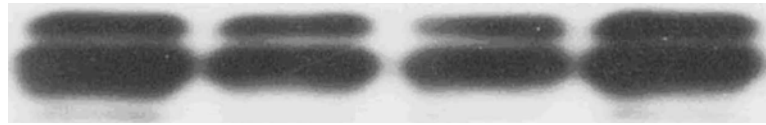

**Tubulin**

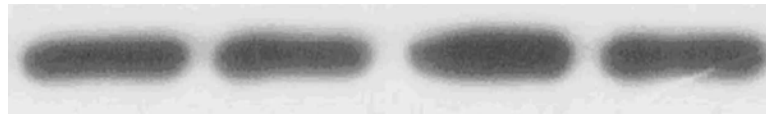

5F

|         |   |   |   |
|---------|---|---|---|
| HA-Hrs  | + | + | + |
| MBCQ    | - | + | - |
| Spautin | - | - | + |
| DMSO    | + | - | - |

Anti-HA

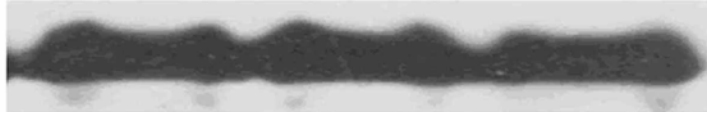

Tubulin

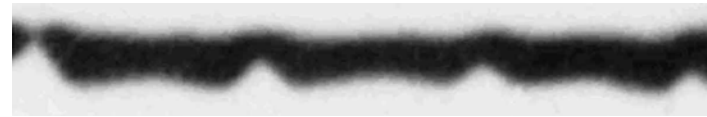

**5G**

|                 |          |          |          |
|-----------------|----------|----------|----------|
| <b>GFP-Atg3</b> | <b>+</b> | <b>+</b> | <b>+</b> |
| <b>MBCQ</b>     | <b>-</b> | <b>+</b> | <b>-</b> |
| <b>Spautin</b>  | <b>-</b> | <b>-</b> | <b>+</b> |
| <b>DMSO</b>     | <b>+</b> | <b>-</b> | <b>-</b> |

**Anti-GFP**

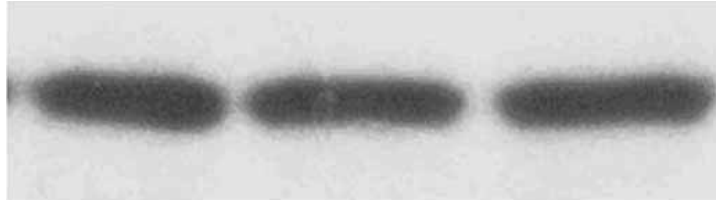

**Tubulin**

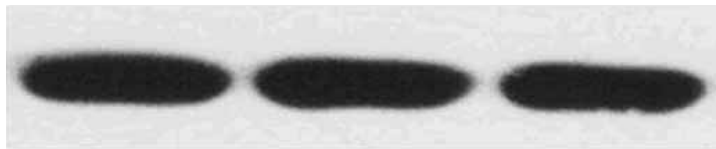

|           |                |          |          |          |
|-----------|----------------|----------|----------|----------|
| <b>5H</b> | <b>HA-Atg7</b> | <b>+</b> | <b>+</b> | <b>+</b> |
|           | <b>MBCQ</b>    | <b>-</b> | <b>+</b> | <b>-</b> |
|           | <b>Spautin</b> | <b>-</b> | <b>-</b> | <b>+</b> |
|           | <b>DMSO</b>    | <b>+</b> | <b>-</b> | <b>-</b> |

**Anti-HA**

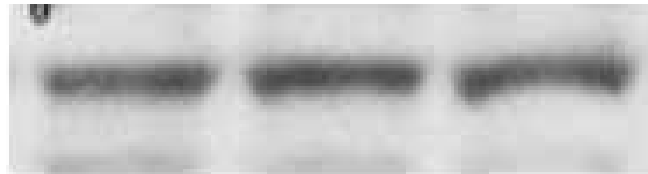

**Tubulin**

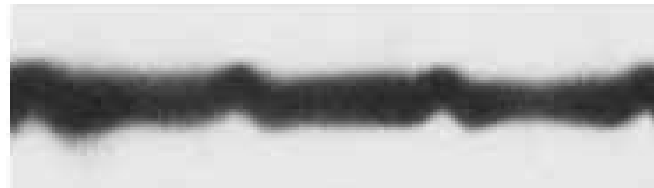



5I

|                |   |   |   |   |   |   |   |   |
|----------------|---|---|---|---|---|---|---|---|
| <b>3-MA</b>    | - | - | - | + | - | - | - | + |
| <b>Spautin</b> | - | - | + | - | - | - | + | - |
| <b>Rap</b>     | - | + | + | + | - | + | + | + |
| <b>DMSO</b>    | + | - | - | - | + | - | - | - |

**Beclin1**

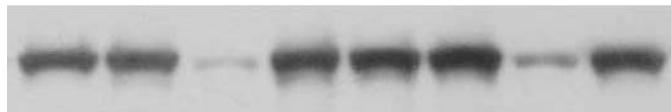

**LC3-I**

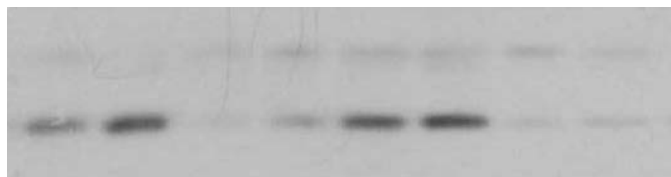

**LC3-II**

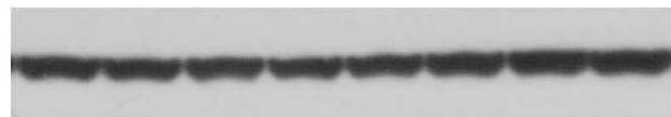

**Tubulin**

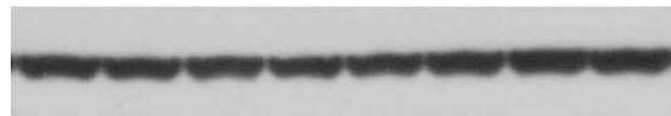

6

|             |   |   |   |   |
|-------------|---|---|---|---|
| GFP-Beclin1 | + | + | + | + |
| NH4Cl       | - | - | - | + |
| MG132       | - | - | + | - |
| Spautin     | - | + | + | + |
| DMSO        | + | - | - | - |

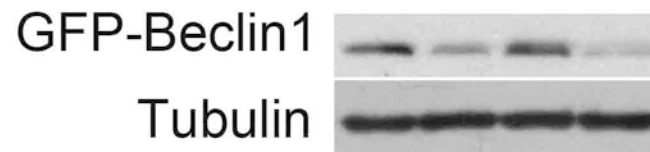

Supplement: NIHMS402089-supplement-supplemental_figures.pdf [file NIHMS402089-supplement-supplemental_figures.pdf]
